# Supplementary material
Source: ML conference proceedings conference paper supplement (https://proceedings.mlr.press/v119/drutsa20a.html)
Supplement: Supplementary file [file drutsa20a-supp.pdf]

# Optimal Non-parametric Learning in Repeated Contextual Auctions with Strategic Buyer: SUPPLEMENTARY MATERIALS\*

Alexey Drutsa<sup>†</sup>

12 July 2020

## Contents

|                                                                                   |          |
|-----------------------------------------------------------------------------------|----------|
| <b>A Missed proofs</b>                                                            | <b>1</b> |
| A.1 Proof of Proposition 1 . . . . .                                              | 1        |
| A.2 Proof of Proposition 2 . . . . .                                              | 2        |
| A.3 Proof of Lemma 2 . . . . .                                                    | 2        |
| A.4 Proof of Theorem 1 . . . . .                                                  | 3        |
| <b>B The pseudo-code of the PELS algorithm</b>                                    | <b>4</b> |
| <b>C Auxiliary statements</b>                                                     | <b>5</b> |
| C.1 Statement on linear programming . . . . .                                     | 5        |
| C.2 Remarks . . . . .                                                             | 5        |
| <b>D The game’s workflow and structure of the knowledge</b>                       | <b>6</b> |
| <b>E Examples for the notion of a start of <math>r</math>-length penalization</b> | <b>6</b> |

## A Missed proofs

### A.1 Proof of Proposition 1

Here we present some details for the proof of Proposition 1. Some ideas used here are similar to the ones used in [7, 2, 4, 5].

**I.** Let

$$S_X(\sigma) = \mathbb{E}\left[\sum_{s=t}^T \gamma^{s-1} a_s(v(x_s) - p_s) \mid x_s \in X, \sigma\right] \tag{A.1}$$

be the future expected surplus of the buyer over those rounds  $s \geq t$  whose feature vector  $x_s$  belongs to a set  $X \subseteq \mathbb{X}$  when he follows a strategy  $\sigma^1$ . It is easy to see that the full future surplus will be

---

\*This is the supplementary materials for the work published in Proceedings of the 37-th International Conference on Machine Learning, Vienna, Austria, PMLR 119, 2020

<sup>†</sup>Yandex, Moscow, Russia (www.yandex.com); Faculty of Mechanics and Mathematics, Lomonosov Moscow State University, Moscow, Russia; e-mail: [adrutsa@yandex.ru](mailto:adrutsa@yandex.ru).

<sup>1</sup>A buyer (pure) strategy is a map  $\sigma : \sqcup_{t=1}^T \mathfrak{S}_t \rightarrow \{0, 1\}$  that maps any state  $\mathfrak{s} \in \mathfrak{S}_t$  in a round  $t$  to a decision  $\sigma(\mathfrak{s}) \in \{0, 1\}$ . A mixed strategy is a probability distribution over pure strategies.

$S_{\mathbb{X}}(\sigma)$  and, for any  $X \subseteq \mathbb{X}$  and any strategy  $\sigma$ , it can be decomposed as follows:

$$S_{\mathbb{X}}(\sigma) = S_X(\sigma) + S_{\mathbb{X} \setminus X}(\sigma). \quad (\text{A.2})$$

The considered set  $\tilde{X}$  is isolated (from  $\mathbb{X} \setminus \tilde{X}$ ) after the current round  $t$  (as in Definition 3). Let two strategies  $\sigma_1$  and  $\sigma_2$  are s.t. buyer decisions coincide (between the strategies) in all rounds where  $x_s$  belongs to a set  $\mathbb{X} \setminus X$  (outside of  $\tilde{X}$ ), i.e., formally, in all the states  $\mathfrak{L}(\tilde{\mathfrak{s}}, \mathbb{X} \setminus X) \cup \mathfrak{R}(\tilde{\mathfrak{s}}, \mathbb{X} \setminus X)$ . Then  $S_{\mathbb{X} \setminus \tilde{X}}(\sigma_1) = S_{\mathbb{X} \setminus \tilde{X}}(\sigma_2)$ .

Therefore, when we compare strategies that differ in decisions within  $\tilde{X}$  only, it is enough to investigate  $S_{\tilde{X}}(\sigma)$  with strategies  $\sigma$  that are equal outside of  $\tilde{X}$ .

**II.** In our case (see the proof of Proposition 1 in the main text), we have two strategies: the optimal one  $\sigma^{\text{Opt}}$  and the strategy  $\sigma'$  that coincides with  $\sigma^{\text{Opt}}$  in all states outside  $\tilde{X}$ . So, applying the arguments above, we have (due to optimality):

$$S_{\mathbb{X}}(\sigma^{\text{Opt}}) \geq S_{\mathbb{X}}(\sigma') \Rightarrow S_{\tilde{X}}(\sigma^{\text{Opt}}) + S_{\mathbb{X} \setminus \tilde{X}}(\sigma^{\text{Opt}}) \geq S_{\tilde{X}}(\sigma') + S_{\mathbb{X} \setminus \tilde{X}}(\sigma') \quad (\text{A.3})$$

$$\Rightarrow S_{\tilde{X}}(\sigma^{\text{Opt}}) + S_{\mathbb{X} \setminus \tilde{X}}(\sigma^{\text{Opt}}) \geq S_{\tilde{X}}(\sigma') + S_{\mathbb{X} \setminus \tilde{X}}(\sigma^{\text{Opt}}) \Rightarrow S_{\tilde{X}}(\sigma^{\text{Opt}}) \geq S_{\tilde{X}}(\sigma'). \quad (\text{A.4})$$

**III.** Note that, in the proof in the main text, we implicitly use that the strategy  $\sigma^{\text{Opt}}$  is pure (at least w.r.t. the decision in the round  $t$ ). This is done for the sake of exposition, and the result holds for a mixed strategy as well. Indeed, let  $\sigma_0$  be an optimal strategy among all the strategies that have decision  $a_t = 0$  in the round  $t$ . Similarly, let  $\sigma_1$  be an optimal strategy among all the strategies that have decision  $a_t = 1$  in the round  $t$ . Then a mixed  $\sigma^{\text{Opt}}$  is a linear combination of these strategies:  $\sigma^{\text{Opt}} = \alpha\sigma_1 + (1 - \alpha)\sigma_0$ ,  $\alpha \in (0, 1)$ . Instead of  $\sigma'$  consider  $\sigma'' = \alpha\sigma_1 + (1 - \alpha)\sigma'_0$ , where  $\sigma'_0$  be the strategy, where the buyer accepts the good in the round  $t$  and rejects each future good from  $\tilde{X}$  ( $\sigma'_0$  coincides with  $\sigma_0$  for goods in  $\mathbb{X} \setminus \tilde{X}$ ).

Hence, due to linearity of surplus (since it is an expectation), we have:

$$S_{\mathbb{X}}(\sigma^{\text{Opt}}) \geq S_{\mathbb{X}}(\sigma'') \Rightarrow \alpha S_{\mathbb{X}}(\sigma_1) + (1 - \alpha)S_{\mathbb{X}}(\sigma_0) \geq \alpha S_{\mathbb{X}}(\sigma_1) + (1 - \alpha)S_{\mathbb{X}}(\sigma'_0) \Rightarrow S_{\mathbb{X}}(\sigma_0) \geq S_{\mathbb{X}}(\sigma'_0) \quad (\text{A.5})$$

In further steps (e.g., in Eq. (A.3)), use  $\sigma_0$  instead of  $\sigma^{\text{Opt}}$  and  $\sigma'_0$  instead of  $\sigma'$ .

## A.2 Proof of Proposition 2

*Proof of Proposition 2.* Similarly to the proof of Prop. 1 (see also details in App. A.1), we analyze buyer surplus  $S_{\tilde{X}}(\sigma)$  calculated only over rounds from  $\tilde{X}$  (due to isolation of  $\tilde{X}$  from  $\mathbb{X} \setminus \tilde{X}$ ). Let  $\sigma^{\text{Opt}}$  be the optimal strategy of the buyer in the round  $t$ , what implies that  $S_{\tilde{X}}(\sigma^{\text{Opt}}) \geq 0$ , because the buyer can reject all goods in  $\tilde{X}$  and get at least 0. The left-hand side of the inequality can be upper bounded as follows

$$\begin{aligned} S_{\tilde{X}}(\sigma^{\text{Opt}}) &= \gamma^{t-1}(v(x_t) - p_t) + \mathbb{E}\left[\sum_{s=t}^T \gamma^{s-1} a_s(v(x_s) - p_s) \mid x_s \in \tilde{X}, \sigma^{\text{Opt}}\right] \\ &\leq \gamma^{t-1}(v(x_t) - p(\mathfrak{s})) + \sum_{s=t+1}^T \gamma^{s-1} \sup_{x \in \tilde{X}} [v(x) - u_{\mathfrak{s},1}(x)], \end{aligned} \quad (\text{A.6})$$

where we upper bounded instant surpluses in all future rounds as maximal possible ones by  $\sup_{x \in \tilde{X}} (v(x) - u_{\mathfrak{s},1}(x))$ . The latter expression can be trivially bounded by  $v(x_t) + L\text{diam}(\tilde{X}) - \inf_{x \in \tilde{X}} u_{\mathfrak{s},1}(x)$  (see Def. 1 for  $u_{\mathfrak{s},1}(\cdot)$ ). Combining all inequalities and dividing by  $\gamma^{t-1}$ , one gets:

$$v(x_t) - p(\mathfrak{s}) + \frac{\gamma}{1 - \gamma} \left( v(x_t) + L\text{diam}(\tilde{X}) - \inf_{x \in \tilde{X}} u_{\mathfrak{s},1}(x) \right) \geq 0, \quad (\text{A.7})$$

what implies the proposition after using the condition on  $p(\mathfrak{s}) - \inf_{x \in \tilde{X}} u_{\mathfrak{s},1}(x)$  and term rearrangement.  $\square$

### A.3 Proof of Lemma 2

*Proof of Lemma 2.* First, we prove (a) under the assumption: let in an exploration round  $t$ , the current  $u^X$  and  $w^X$  are s.t.  $(2\eta + 3)L\text{diam}(X) \leq w^X - u^X$ . This implies  $w^X: (w^X - u^X) - 2(\eta + 1)L\text{diam}(X) \geq L\text{diam}(X)$ . Since the gap  $w^X - u^X$  reduces exactly by  $L\text{diam}(X)$  after an acceptance and exactly by  $w^X: (w^X - u^X) - 2(\eta + 1)L\text{diam}(X)$  after a rejection, we get the statement (a) for this round.

The proof of (b) is done by induction on the depth  $m^X$  of a current box  $X$  (s.t.  $x_t \in X \in \mathcal{X}$ ). When  $m^X = 0$ : at the start of the game, the bounds hold by the construction of the initial partition  $\mathcal{X}$  of  $\mathbb{X}$ :  $1/\text{diam}(X) = \lceil (4\eta + 6)L \rceil \in \lceil (2\eta + 3)L, \lceil (4\eta + 6)L \rceil \rceil$  and  $w^X - u^X = 1$ . Hence, in all exploration rounds within this box with  $m^X = 0$ , we will have  $(2\eta + 3)L\text{diam}(X) \leq w^X - u^X$ , because violation of this condition will result in a bisection of  $X$ . Assume (a) and (b) hold for boxes of depth  $m - 1 \in \mathbb{Z}_+$ . Let  $t$  be the first exploration round in a box  $X$  of depth  $m > 0$ . This box is a result of the bisection of a box  $X_1$  of depth  $m - 1$  in a exploration round  $t_1$ , what implies that  $w^X - u^X < (2\eta + 3)L\text{diam}(X_1) = 2(2\eta + 3)L\text{diam}(X)$ . The values of the function  $u(\cdot)$  and  $w(\cdot)$  in the round  $t_1$  are denoted by  $u_1$  and  $w_1$ . So, by induction for (a), we know that  $(w_1 - u_1) - (w^X - u^X) \leq (w_1 - u_1) - 2(\eta + 1)L\text{diam}(X_1)$ . Hence,

$$w^X - u^X \geq 2(\eta + 1)L\text{diam}(X_1) = 4(\eta + 1)L\text{diam}(X) \geq (2\eta + 3)L\text{diam}(X).$$

Again, in all exploration rounds within this box with  $m^X = m$ , we will have  $(2\eta + 3)L\text{diam}(X) \leq w^X - u^X$ , because violation of this condition will result in a bisection of  $X$ .  $\square$

### A.4 Proof of Theorem 1

We add the following remark to the proof of Theorem 1 (in the main text).

In the proof of Theorem 1, we used the following inequality

$$T \geq \sum_{m=1}^{M-1} g(m-1)N_m \tag{A.8}$$

to upper bound  $2^M$  via a function of  $T$ . However, this inequality from Eq. (A.8) is useful only for  $M > 1$ . Indeed, note that, when  $M = 1$ , this inequality becomes  $T \geq 0$  and cannot be used to upper bound  $M$ .

So, the case  $M = 1$  should be considered separately. In fact, this case is trivial. Namely, we can show that, if  $M = 1$ , then the upper bound on the strategic regret holds even for  $T = 1$ . From the proof (in the main text) we know that  $R \leq \sum_{m=0}^M C(L, r, \eta)2^{md}N_0$ ; hence, for  $M = 1$ , we have:

$$\begin{aligned} R &\leq \sum_{m=0}^1 C(L, r, \eta)2^{md}N_0 = C(L, r, \eta)N_0(1 + 2^d) \leq C(L, r, \eta)N_02^{d+1} \leq \\ &\leq C(L, r, \eta)N_02^{d+1}\left(\frac{1}{N_0} + 1\right)^{d/(d+1)} = 2^{d+1}C(L, r, \eta)N_0^{1/(d+1)}(1 + N_0)^{d/(d+1)}, \end{aligned} \tag{A.9}$$

where the right-hand side of the latter identity is exactly Eq.(6) with  $T = 1$ .

## B The pseudo-code of the PELS algorithm

---

**Algorithm B.1** Pseudo-code of Penalized Exploiting Lipschitz Search (PELS).

---

```

1: Input:  $L > 0$ ,  $\eta \in \mathbb{R}_+$ ,  $r \in \mathbb{N}$ , and  $g : \mathbb{Z}_+ \rightarrow \mathbb{Z}_+$ 
2: Initialize: Split[] := partition of  $[0, 1]^d$  into  $\lceil (6+4\eta)L \rceil^d$  cubes with  $\text{diam}(\cdot) = 1/\lceil (4\eta+6)L \rceil$ ; Boxes[] :=  $\emptyset$ ;
3: for all Cube  $\in$  Split[] do
4:   Box := NewStructure( $X :=$  Cube,  $u := 0$ ,  $w := 1$ ,  $P := 0$ ,  $E := 0$ ,  $m := 0$ ,  $l := 1/\lceil (4\eta + 6)L \rceil$ );
5:   Boxes[] := Boxes[]  $\cup$  Box; // Add each cube with its associated data
6: end for
7: while the buyer plays do
8:   The seller receives a feature vector  $x \in [0, 1]^d$  from the nature, the buyer observes this vector  $x$  as well;
9:    $j :=$  find  $j$  such that  $x \in$  Boxes[ $j$ ]. $X$ ;
10:  if Boxes[ $j$ ]. $P > 0$  then
11:    Offer the price  $p := 1$  to the buyer; // Penalization
12:    Boxes[ $j$ ]. $P :=$  Boxes[ $j$ ]. $P - 1$ ;
13:    if this price is accepted then offer  $p := 1$  for all remaining rounds;
14:  else
15:    if Boxes[ $j$ ]. $E > 0$  then
16:      Offer the price  $p :=$  Boxes[ $j$ ]. $u$  to the buyer; // Exploitation
17:      Boxes[ $j$ ]. $E :=$  Boxes[ $j$ ]. $E - 1$ ;
18:      if Boxes[ $j$ ]. $E == 0$  then
19:        Split[] := bisect each side of the cube Boxes[ $j$ ]. $X$  to get  $2^d$  cubes;
20:        for all Cube  $\in$  Split[] do
21:          Box := CopyStructure(Boxes[ $j$ ]); // Copy the associated data of the parent cube
22:          Box. $X :=$  Cube; // Replace some associated for the new cube
23:          Box. $m :=$  Box. $m + 1$ ;
24:          Box. $l :=$  Box. $l/2$ ;
25:          Boxes[] := Boxes[]  $\cup$  Box; // Add each cube with its associated data
26:        end for
27:        Remove Boxes[ $j$ ] from Boxes[]; // Remove  $j$ -th cube with its associated data
28:      end if
29:    else
30:      Offer the price  $p :=$  Boxes[ $j$ ]. $u + \eta L$ Boxes[ $j$ ]. $l$  to the buyer; // Exploration
31:      if the buyer accepts the price then
32:        Boxes[ $j$ ]. $u := p - (\eta - 1)L$ Boxes[ $j$ ]. $l$ ;
33:      else
34:        Boxes[ $j$ ]. $w := p + (\eta + 2)L$ Boxes[ $j$ ]. $l$ ;
35:        Boxes[ $j$ ]. $P := r$ 
36:      end if
37:      if Boxes[ $j$ ]. $w -$  Boxes[ $j$ ]. $u < (2\eta + 3)L$ Boxes[ $j$ ]. $l$  then
38:        Boxes[ $j$ ]. $E := g$ (Boxes[ $j$ ]. $m$ );
39:      end if
40:    end if
41:  end if
42: end while

```

---

## C Auxiliary statements

### C.1 Statement on linear programming

**Statement C.1.** Consider the linear program:

$$\begin{aligned}
 \text{maximize } R(z_1, \dots, z_{\overline{M}}) &= \sum_{m=1}^{\overline{M}} z_m \quad \text{s.t.} \\
 \sum_{m=1}^{\overline{M}} \beta_m z_m &\leq C \quad \text{and} \\
 0 \leq z_m &\leq c_m \quad \forall m,
 \end{aligned} \tag{C.1}$$

where  $c_m > 0 \forall m$ ,  $0 < \beta_1 \leq \dots \leq \beta_{\overline{M}}$ , and  $C \leq \sum_{m=1}^{\overline{M}} \beta_m c_m$ . Then the maximum of  $R$  is achieved at

$$(z_1, \dots, z_{\overline{M}}) = \left( c_1, \dots, c_{M-1}, \beta_M^{-1} \left( C - \sum_{m=1}^{M-1} \beta_m c_m \right), 0, \dots, 0 \right), \tag{C.2}$$

where  $M$  is such that the following inequality hold:  $\sum_{m=1}^{M-1} \beta_m c_m < C \leq \sum_{m=1}^M \beta_m c_m$ .

*Proof.* The proof trivially follows from the theory of linear programs. In particular, note that the structure of the solution in Eq. (C.2) is as follows:

- all  $z_i$  have the maximal available value  $c_i$  for all consecutive  $i = 1, \dots, M - 1$ ;
- the next  $z_M$  has value s.t. it is maximal possible to fit the first condition in Eq. (C.1);
- all remaining  $z_i$  are 0 the maximal available value  $c_i$  for all consecutive  $i = M + 1, \dots, \overline{M}$ .

This is because of the following: if there is two consecutive  $z_i$  and  $z_{i+1}$  s.t.  $z_i < c_i$  and  $z_{i+1} > 0$ , then we can without change of  $R$  consider new vector  $\{z_j^{\text{new}}\}_j$ :  $z_i^{\text{new}} := z_i + \epsilon$  and  $z_{i+1}^{\text{new}} := z_{i+1} - \epsilon$ , where  $\epsilon > 0$  is s.t.  $z_i + \epsilon \leq c_i$  and  $z_{i+1} - \epsilon \geq 0$ . Then  $R^{\text{new}} = R$ , while the conditions are satisfied due to the properties  $\epsilon$  and the monotonicity of  $\{\beta_j\}_j$ .  $\square$

### C.2 Remarks

In the definition of PELS, we used  $\{[0, l], (l, 2l], \dots, (1-l, 1]\}^d$  to denote all boxes that are obtained from the split of each side of the cube  $[0, 1]^d$  into  $\lceil (4\eta + 6)L \rceil$  equal parts. This is done for sake of short notations. Formally, the set of all  $\lceil (4\eta + 6)L \rceil^d$  boxes should be written as follows:

$$\mathcal{X} = \left\{ I_1 \times I_2 \times \dots \times I_d \mid (I_1, I_2, \dots, I_d) \in \left\{ [0, l], (l, 2l], \dots, (1-l, 1] \right\}^d \right\}.$$

## D The game's workflow and structure of the knowledge

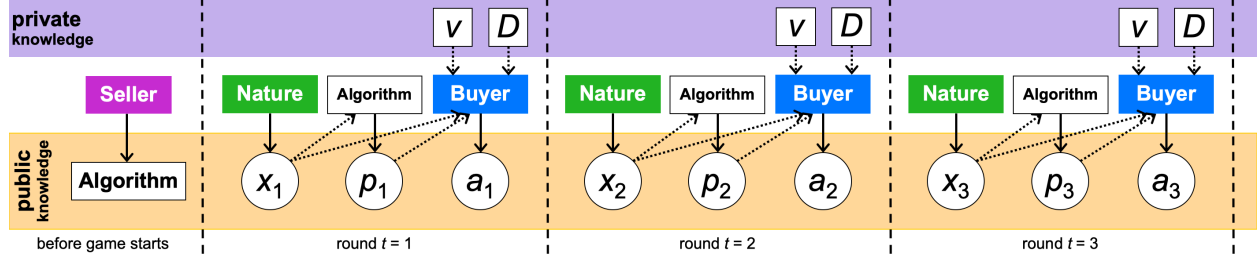

Figure D.1: The game's workflow (an algorithm and the buyer exploit public knowledge available in the previous rounds).

## E Examples for the notion of a start of $r$ -length penalization

Note that the definition of a start of  $r$ -length penalization *does not mean* that all the next  $r - 1$  future rounds are penalizations: instead, penalization rounds will be those whose feature vectors belong to the penalization domain  $\tilde{X}$  (i.e., a round  $s$  is *not* a penalization if  $x_s \notin \tilde{X}$ ).

Also note that a start of  $r$ -length penalization in a round  $t$  *does not mean* that rounds after  $t + r$  will not be penalizations (connected to this start): instead, the counter of penalization rounds is increased only when context of a future round belongs to the penalization domain  $\tilde{X}$ . For instance, if the contexts  $x_{t+1}, \dots, x_{t+r-1} \notin \tilde{X}$  in future rounds  $t + 1, \dots, t + r - 1$ , but we have  $x_{t+r} \in \tilde{X}$  in the round  $t + r$ , then this round  $t + r$  will be the 1-st penalization round associated with the considered start (i.e.,  $r - 2$  penalizations will remain after the round  $t + r$ ). See also the work flow of penalization in the pseudo-code of PELS in Alg. B.1.

Let consider an example:

$$d = 1, \quad \tilde{X} = [0.5, 1], \quad r = 3$$

Let  $x_1 = 0.75$  be a start of 3-length penalization with domain  $\tilde{X} = [0.5, 1]$  and the buyer rejects the price in  $t = 1$ .

Then, the penalization rounds (for this penalization start) will be those whose sequence of context  $x_{1:s}$  is , e.g.,

- $(0.75, 0.6)$ , because  $0.6 \in \tilde{X}$ ;
- $(0.75, 0.2, 0.9)$ , because  $0.9 \in \tilde{X}$ ;
- $(0.75, 0.2, 0.4, 0.7)$ , because  $0.7 \in \tilde{X}$  and contexts of rounds 2, 3, 4 do not belong to  $\tilde{X}$ ;
- $(0.75, 0.2, 0.4, 0.7, 0.8)$ , because  $0.8 \in \tilde{X}$  and only one context ( $x_4 = 0.7$ ) is in  $\tilde{X}$  among contexts of rounds 2, 3, 4;

but the following sequences of context  $x_{1:s}$  terminate with **NON**-penalization rounds (for the considered penalization start):

- $(0.75, 0.2)$ , because  $0.2 \notin \tilde{X}$ ;
- $(0.75, 0.2, 0.4)$ , because  $0.4 \notin \tilde{X}$ ;

- $(0.75, 0.2, 0.9, 0.3)$ , because  $0.3 \notin \tilde{X}$ ;
- $(0.75, 0.2, 0.4, 0.7, 0.8, 0.9)$ , because, in previous rounds  $(2, 3, 4, 5)$ , already 2 contexts  $(0.7$  and  $0.8)$  belonged to  $\tilde{X}$  and  $r - 1 = 2$ .

## References

- [1] K. Amin, A. Rostamizadeh, and U. Syed. Learning prices for repeated auctions with strategic buyers. In *NIPS'2013*, pages 1169–1177, 2013.
- [2] A. Drutsa. Horizon-independent optimal pricing in repeated auctions with truthful and strategic buyers. In *WWW'2017*, pages 33–42, 2017.
- [3] A. Drutsa. On consistency of optimal pricing algorithms in repeated posted-price auctions with strategic buyer. *CoRR*, abs/1707.05101, 2017.
- [4] A. Drutsa. Weakly consistent optimal pricing algorithms in repeated posted-price auctions with strategic buyer. In *ICML'2018*, pages 1318–1327, 2018.
- [5] A. Drutsa. Reserve pricing in repeated second-price auctions with strategic bidders. In *ICML'2020*, 2020.
- [6] J. Mao, R. Leme, and J. Schneider. Contextual pricing for lipschitz buyers. In *Advances in Neural Information Processing Systems*, pages 5648–5656, 2018.
- [7] M. Mohri and A. Munoz. Optimal regret minimization in posted-price auctions with strategic buyers. In *NIPS'2014*, pages 1871–1879, 2014.
- [8] A. Vanunts and A. Drutsa. Optimal pricing in repeated posted-price auctions with different patience of the seller and the buyer. In *Advances in Neural Information Processing Systems*, pages 939–951, 2019.
- [9] A. Zhiyanov and A. Drutsa. Bisection-based pricing for repeated contextual auctions against strategic buyer. In *ICML'2020*, 2020.
